# Supplementary material
Source: publisher figshare collection journal article supplement (https://frontiersin.figshare.com/ndownloader/files/14207540)
Supplement: Supplementary file [file 14207540]

## Supplementary Material

### A Comprehensive Analysis of Population Differences in *LRRK2* Variant Distribution in Parkinson's disease

Li Shu<sup>1†</sup>, Yuan Zhang<sup>1†</sup>, Qiying Sun<sup>2,3,4</sup>, Hongxu Pan<sup>1</sup>, Beisha Tang<sup>1,3,4,5\*</sup>

<sup>†</sup> These authors have contributed equally to this work and are co-first authors.

\* Correspondence: Beisha Tang [bstang7398@163.com](mailto:bstang7398@163.com)

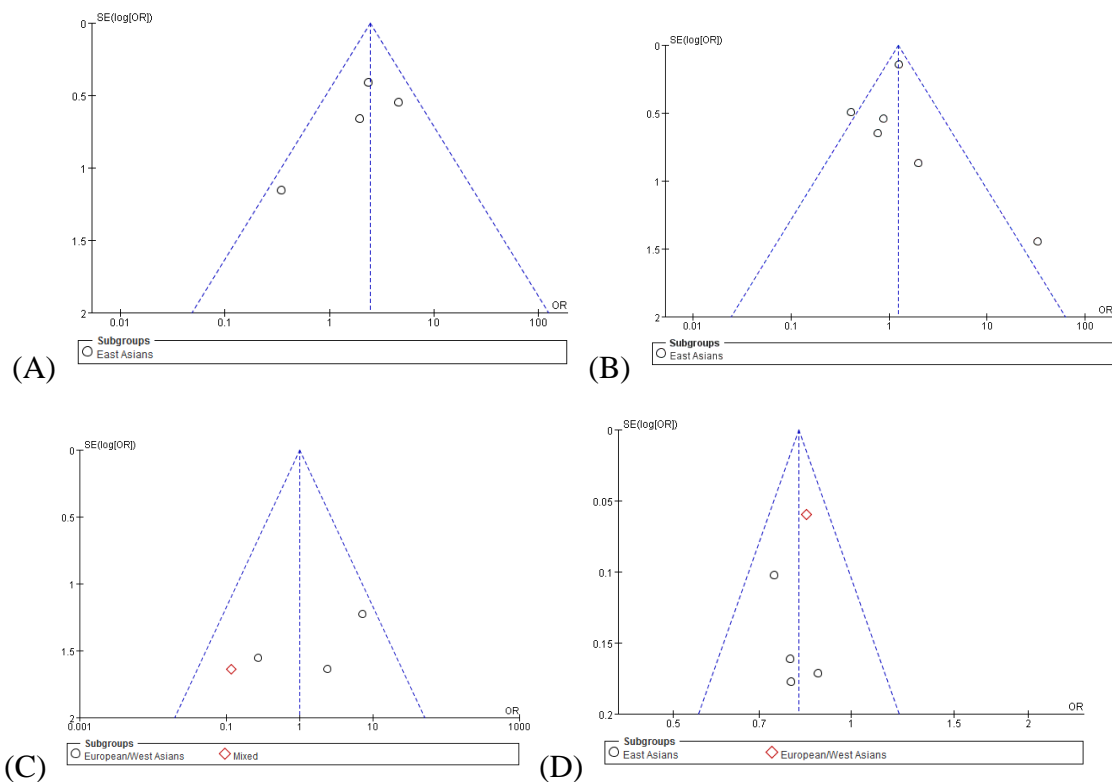

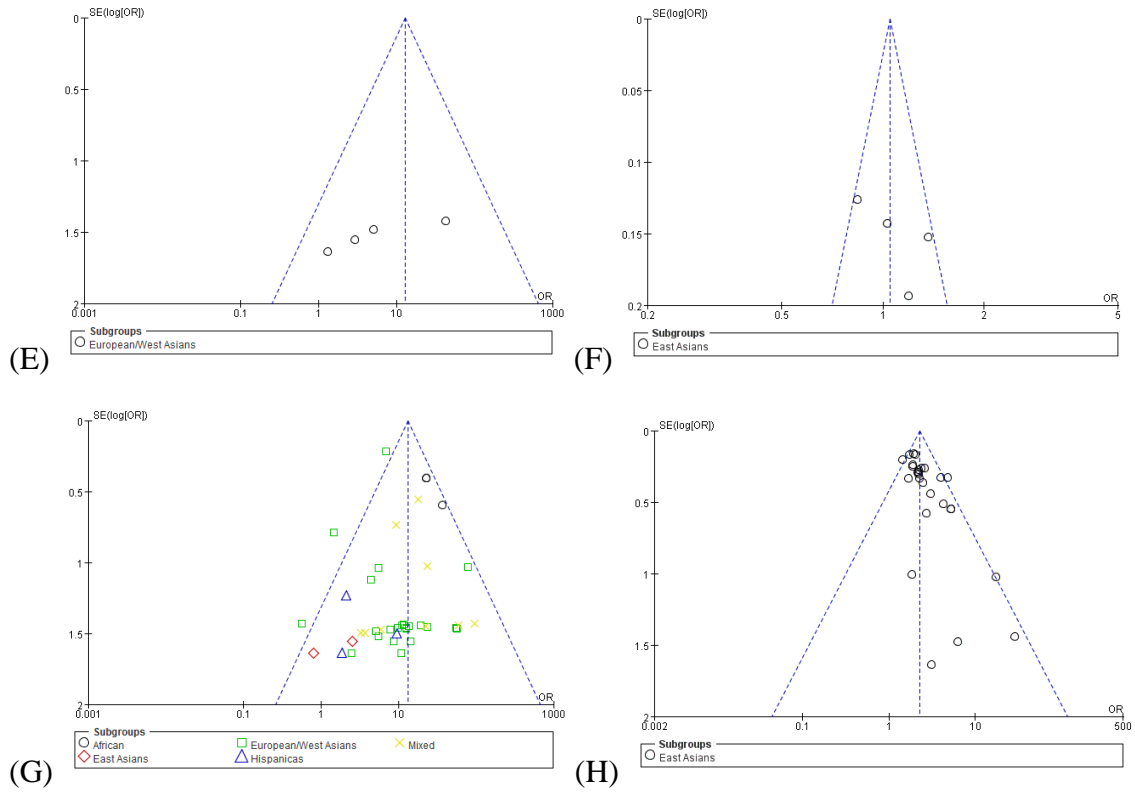

**Supplementary Figure 2:** Funnel plots of the association between *LRRK2* variants and PD risks in total population and by ethnicity. (A)-(H) represented the pooled results of A419V, P755L, R793M, R1398H, R1441C/G/H, S1647T, G2019S, G2385R variants separately.
